# Supplementary material for: Human glioma stem-like cells induce malignant transformation of bone marrow mesenchymal stem cells by activating TERT expression
Source: PubMed Central journal article supplement (PMC5732816; doi:10.18632/oncotarget.22301), 2017-11-06
Supplement: oncotarget-08-104418-s001.pdf [file oncotarget-08-104418-s001.pdf]

## Human glioma stem-like cells induce malignant transformation of bone marrow mesenchymal stem cells by activating TERT expression

### SUPPLEMENTARY MATERIALS

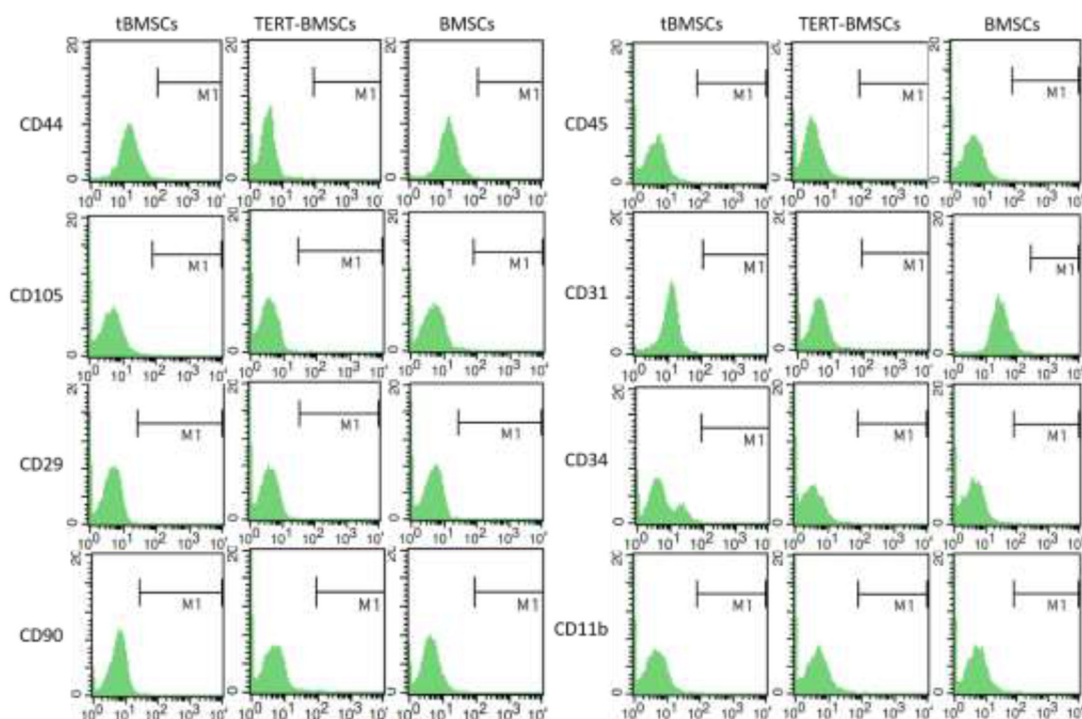

Supplemental Figure 1: Isotype control of cell markers.

Supplemental Table 1: The proportion of expression of the isotype control antibody.

| Isotype Control | tBMSCs |      | TERT-BMSCs |      | BMSCs |      |
|-----------------|--------|------|------------|------|-------|------|
|                 | ALL%   | M1%  | ALL%       | M1%  | ALL%  | M1%  |
| CD44 IgG2       | 90.93  | 0.03 | 90.16      | 0.00 | 90.08 | 0.00 |
| CD105 IgG2b     | 92.95  | 0.02 | 97.68      | 0.01 | 91.78 | 0.01 |
| CD29 IgG2a      | 98.89  | 0.00 | 98.43      | 0.01 | 98.92 | 0.00 |
| CD90 IgG1       | 99.06  | 0.05 | 96.97      | 0.04 | 90.45 | 0.00 |
| CD45 IgG1       | 90.33  | 0.02 | 98.09      | 0.00 | 92.12 | 0.02 |
| CD31 IgG1       | 94.86  | 0.00 | 85.79      | 0.00 | 92.21 | 0.01 |
| CD34 IgG1       | 89.78  | 0.00 | 91.37      | 0.00 | 90.83 | 0.03 |
| CD11b IgG       | 92.59  | 0.02 | 92.16      | 0.02 | 91.68 | 0.07 |
